# Supplementary material for: TGFβ2-Hepcidin Feed-Forward Loop in the Trabecular Meshwork Implicates Iron in Glaucomatous Pathology
Source: PubMed Central journal article supplement (PMC7401420; doi:10.1167/iovs.61.3.24), 2020-03-17
Supplement: iovs-61-3-24_s001.pdf [file iovs-61-3-24_s001.pdf]

## Supplementary file

**Supplementary Table 1: List of biological subjects**

| <b>Human tissues used for primary TM cell culture and whole tissue lysates</b> |                                                    |            |                                                                      |
|--------------------------------------------------------------------------------|----------------------------------------------------|------------|----------------------------------------------------------------------|
| <b>Source: Lions Gift of Sight</b>                                             |                                                    |            |                                                                      |
| <b>PMI (h)/ PCoD*</b>                                                          | <b>Age (year)</b>                                  | <b>Sex</b> | <b>Tissue region</b>                                                 |
| 15/ Leukemia                                                                   | 68                                                 | M          | Perfusion experiment                                                 |
| 14 /Parkinson's Disease                                                        | 92                                                 | F          | Perfusion experiment                                                 |
| 14/ Hodgkin's lymphoma                                                         | 29                                                 | M          | Perfusion experiment                                                 |
| 14/Sepsis                                                                      | 77                                                 | F          | Trabecular meshwork cell culture                                     |
| 3/end-stage renal disease                                                      | 78                                                 | F          | Trabecular meshwork cell culture                                     |
| 12/Multiple system failure                                                     | 67                                                 | M          | Trabecular meshwork cell culture                                     |
| 7.5/Acute cardiac event                                                        | 65                                                 | M          | Trabecular meshwork cell culture                                     |
|                                                                                |                                                    |            | TM cells from Dr. Rhee's lab (from 6 different donors at passage 2). |
| <b>Bovine samples</b>                                                          |                                                    |            |                                                                      |
| <b>Breed</b>                                                                   | <b>Tissue Region</b>                               |            |                                                                      |
| Mixed                                                                          | Trabecular meshwork/ Anterior Chamber/Whole globes |            |                                                                      |

\*PMI (h)- Postmortem interval (from death till time of Enucleation) / PCoD- Primary cause of death

**Supplementary Table 2: List of antibodies**

| <b>Primary Antibody</b>                                                  | <b>Host</b> | <b>Cat. No.</b> | <b>Company</b>         | <b>Dilution</b>        |
|--------------------------------------------------------------------------|-------------|-----------------|------------------------|------------------------|
| Hepcidin antimicrobial peptide                                           | Rb          | NBP1-59337      | Novus biologicals, USA | WB- 7/1000             |
| Ferroportin (Fpn)                                                        | Rb          | NBP1-21502      | Novus biologicals, USA | WB-2/500<br>IHC-1/100  |
| TGFβ2                                                                    | m           | ab36495         | abcam, USA             | WB-1/500               |
| Ferritin                                                                 | Rb          | F5012           | Sigma Aldrich, USA     | WB-1/1000<br>IHC-1/100 |
| Vimentin                                                                 | m           | sc-6260         | Santa Cruz, USA        | WB-1/500               |
| β-actin                                                                  | m           | MAB1501         | Millipore, USA         | WB-1/5000              |
| Rabbit IgG, polyclonal - Isotype Control                                 | -           | ab37415         | abcam, USA             | IHC- 1/100             |
| <b>Secondary Antibody</b>                                                |             |                 |                        |                        |
| HRP-conjugated secondary anti- mouse                                     | Sh          | NA931V          | GE Healthcare, USA     | WB-1/10000             |
| HRP-conjugated secondary anti- rabbit                                    | Dn          | NA934V          | GE Healthcare, USA     | WB-1/10000             |
| Anti-Rabbit IgG (H+L) cross-adsorbed secondary antibody, Alexa Fluor 546 | g           | A11071          | Invitrogen, USA        | IHC- 1/1000            |

Rb- rabbit, m- mouse, Sh- sheep, Dn- donkey, g-goat; WB- Western blotting, IHC- immunohistochemistry

**Supplementary Table 3: List of primers**

| <b>Target gene</b>    | <b>Sequence</b>              |
|-----------------------|------------------------------|
| bov hepcidin-F        | 5'-TCCTTGTCCTGCTCAGCCTG-3'   |
| bov hepcidin-R        | 5'-CAGCAGAAGATGCAGATGGGA-3'  |
| bov-TGF $\beta$ 2-F   | 5'-TGGCTTCACCATAAAGACAGGA-3' |
| bov-TGF $\beta$ 2-R   | 5'-TACAAAAGTGCAGCAGGGACA-3'  |
| bov- $\beta$ -ACTIN-F | 5'-CTTCCTGGGCATGGAATCCT-3'   |
| bov- $\beta$ -ACTIN-R | 5'-TTGATCTTCATTGTGCTGGGTG-3' |
| hu hepcidin-F         | 5'-CCTGACCAGTGGCTCTGTTT-3'   |
| hu hepcidin-R         | 5'-CACATCCCACACTTTGATCG-3'   |
| hu TGF $\beta$ 2-F    | 5'-TGGCTTCACCATAAAGACAGGA-3' |
| hu TGF $\beta$ 2-R    | 5'-TACAAAAGTGCAGCAGGGAC-3'   |
| hu GAPDH-F            | 5'-GAGTCAACGGATTTGGTCGT-3'   |
| hu GAPDH-R            | 5'-GGTGCCATGGAATTTGCCAT-3'   |

**Supplementary Figure 1 (S1)**

**Fig S1.** Full images for all cropped images are presented.

**Fig. 1 in manuscript**

**Figure 1.A**

**Bovine RT-PCR (2% gel)**

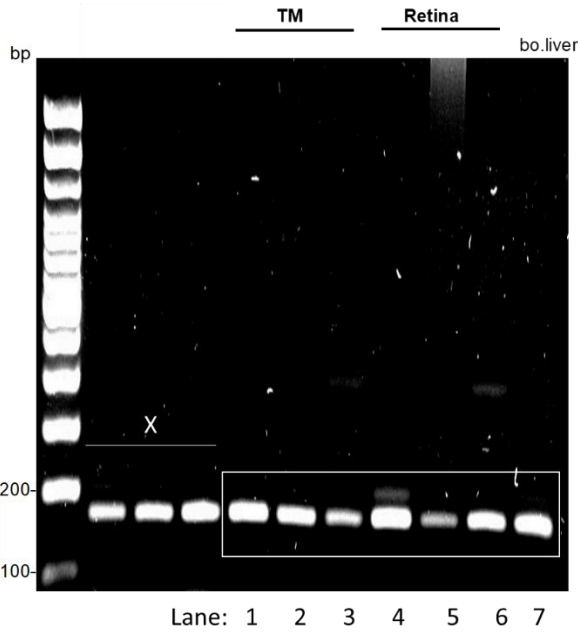

**RT-PCR**

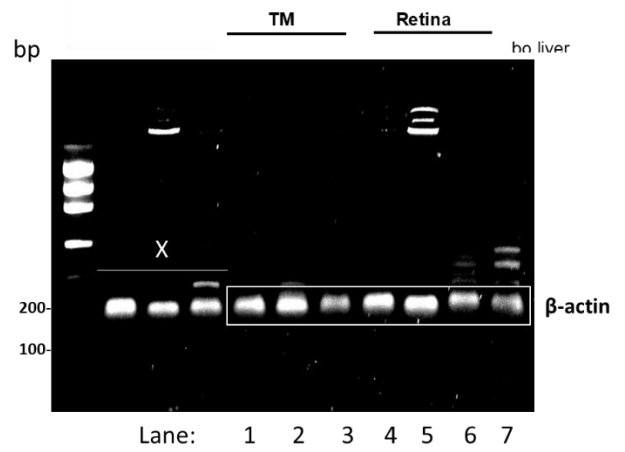

**Figure 1.B**

**Bovine TM tissues (2% gel)**

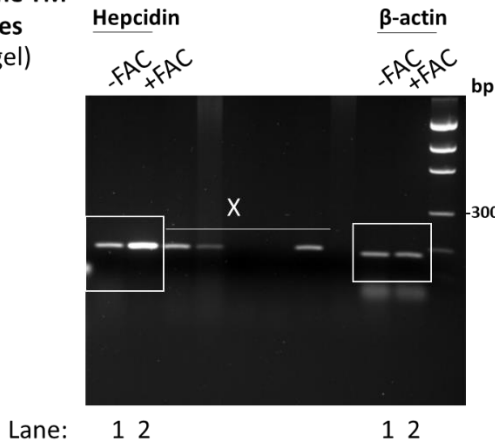

**Figure 1.D**

**Human TM cells (2% gel)**

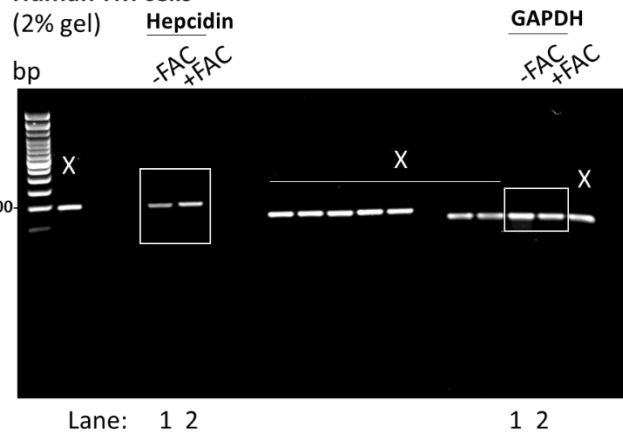

**Legend:** Full blots for Fig. 1.

**Fig. 2 in manuscript**

**Figure 2.A**

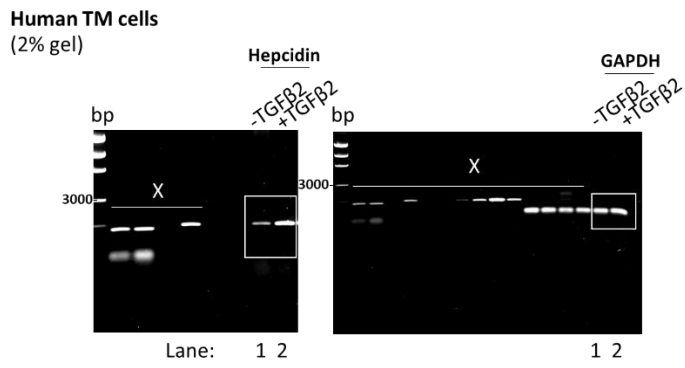

**Figure 2.C**

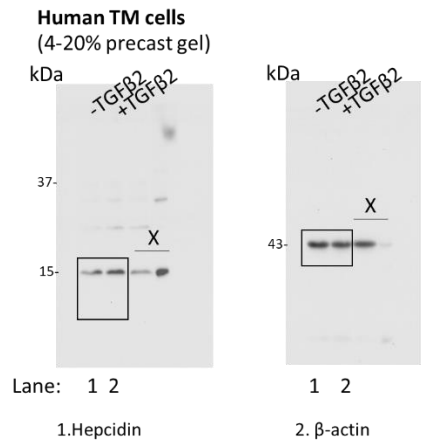

**Figure 2.E**

**Bovine ex-vivo TM**

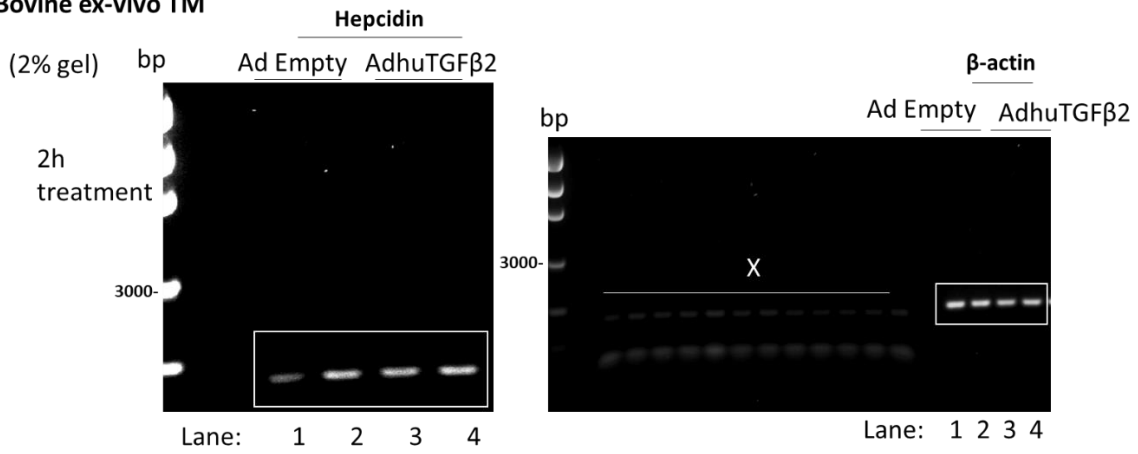

**Figure 2.G**

**Bovine ex-vivo (12% gel)**

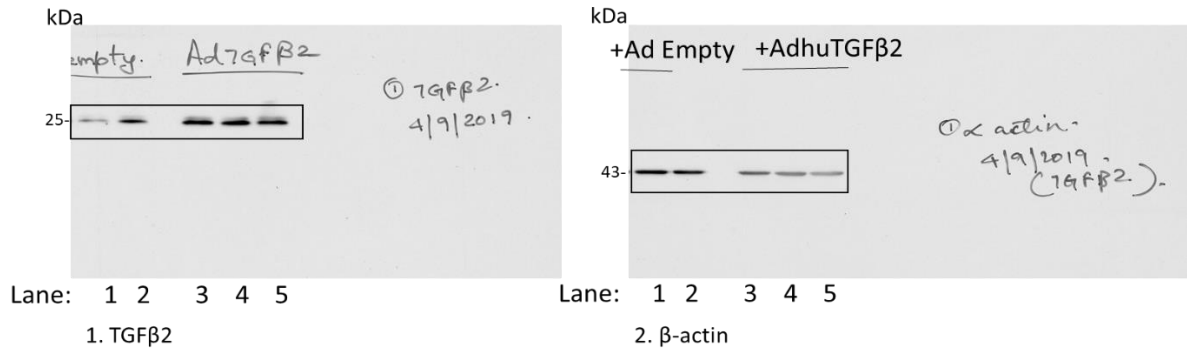

**Bovine ex-vivo (4-20% precast gel)**

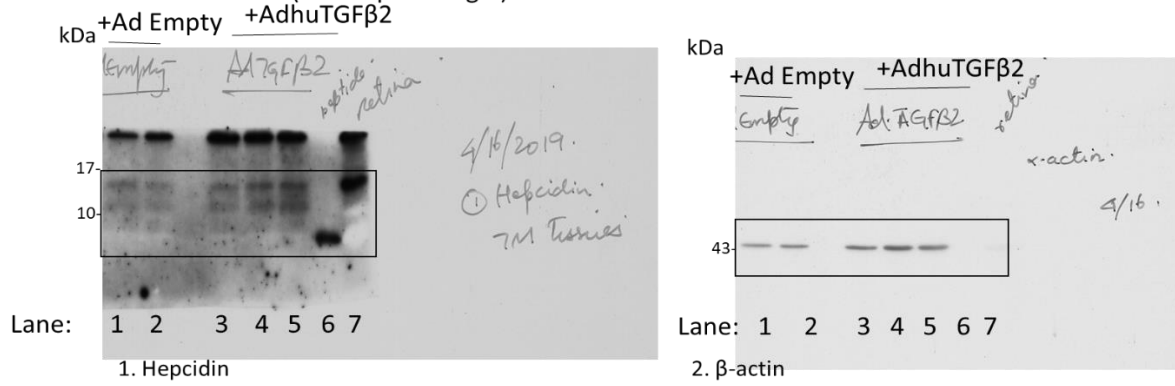

**Legend:** Full blots for Fig. 2.

**Fig. 3 in manuscript**

**Figure 3.A**

**Hu TM cells (12% gel)**

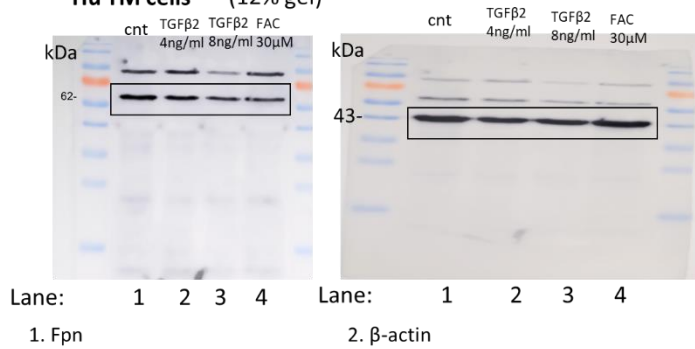

**Legend:** Full blots for Fig. 3.

**Fig. 4 in manuscript**

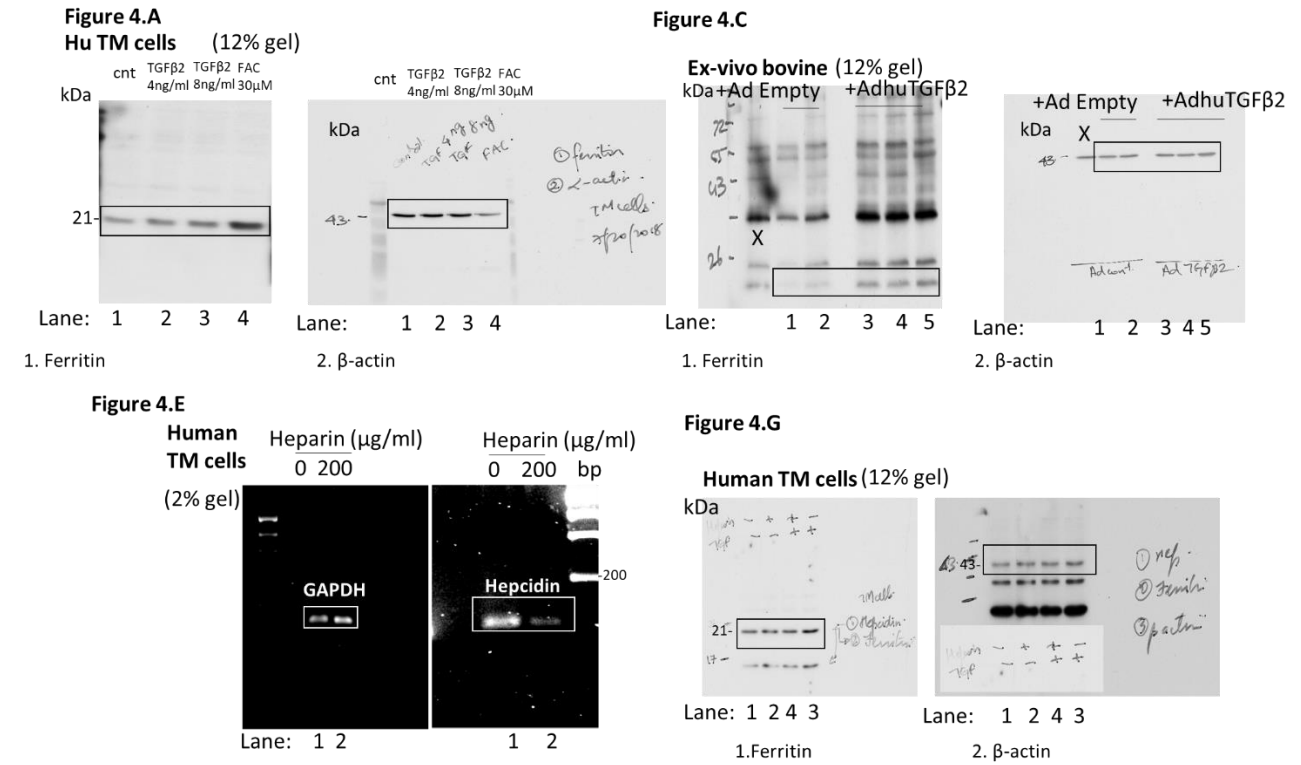

**Legend:** Full blots for Fig. 4.

**Fig. 5 in manuscript**

**Figure 5.B**

**Bovine ex-vivo TM**

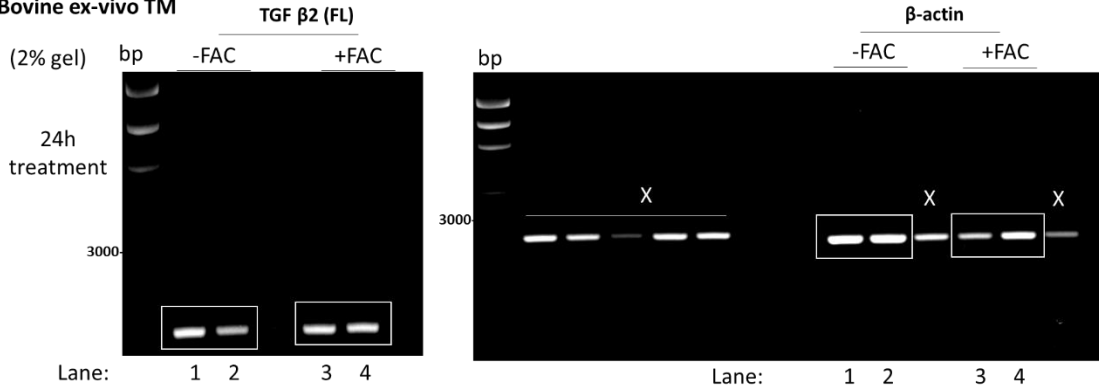

**Figure 5.D Hu TM cells (12% gel)**

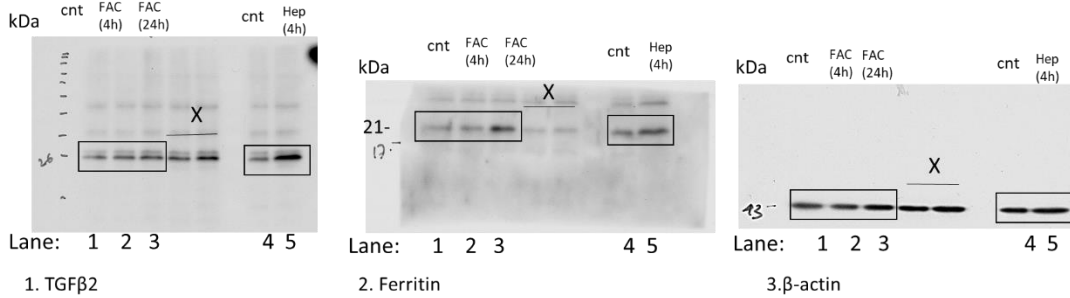

**Figure 5.F**

**Hu TM cells (12% gel)**

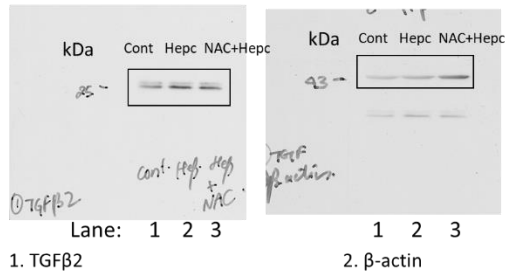

**Figure 5.H**

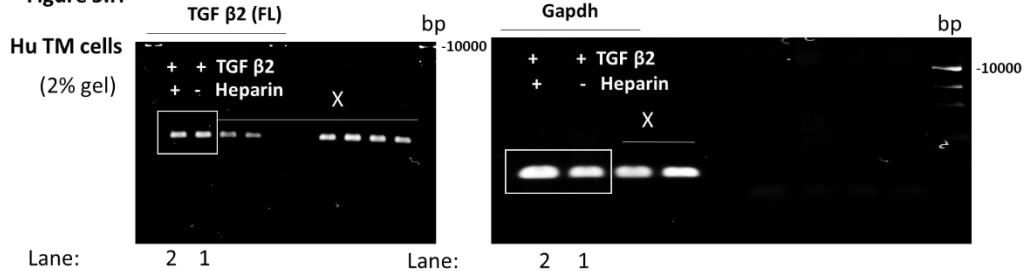

**Legend:** Full blots for Fig. 5.

X: marks all irrelevant samples





### Supplementary Figure 3 (S3)

#### Fig S3.

Different concentrations of TGF $\beta$ 2 was tested on primary human TM cells to mimic glaucomatous alterations. 0,0.6 (physiological concentration), 4,8 and 10 ng/mL of TGF $\beta$ 2 was treated for 48 hours and evaluated for expression of extra cellular matrix protein, vimentin which is known to overexpress confirming glaucomatous changes *in-vitro* (**Figure S3 A**). An evident upregulation of vimentin with minimal toxicity (estimating the lactose dehydrogenase (LDH) content in the medium) was observed at 8ng/ml which was optimized for the study (**Figure S3 B & C**). The Lactose Dehydrogenase (LDH) release assay was carried out to determine the cytotoxicity of different study treatments, by employing commercially available LDH detection kit (Roche-11644793001), as per manufacturer's instruction. Following treatments, the plate containing the cells was centrifuged at 1000 rpm for 10 min to obtain cell free supernatants, which were then incubated for 30 min in dark with the LDH substrate and the reading was obtained at 492 nm with reference wavelength of 620 nm using BioTek, Synergy 4 microplate reader.

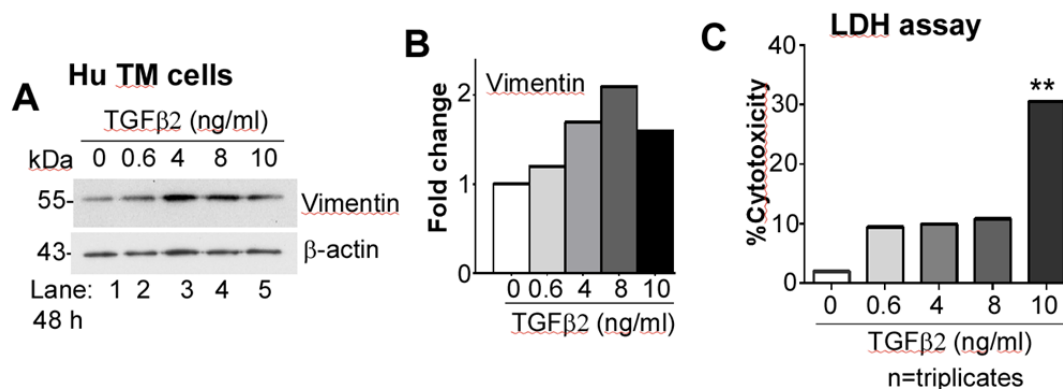

**Legend Fig S3.** (A) Immunoblotting results clearly show a marked change in vimentin expression following treatment with 8ng/ml for 48 h and hence this treatment concentration was

optimized for the experiments in the current study to mimic glaucoma in different models. **(B)** Density of protein bands after normalization with  $\beta$ -actin show a 2-fold increase of vimentin at 8ng/ml. **(C)** LDH assay show minimal toxicity at 0.6 (physiological concentration), 4 and 8ng/ml TGF $\beta$ 2 concentration. However, at 10 ng/ml, there was a significant 27% cytotoxicity and hence 8ng/ml which showed highest vimentin expression and lowest cytotoxicity was considered as the optimal treatment to induce glaucomatous changes in primary human TM cells in-vitro with minimal cytotoxicity.

**Supplementary Figure 4 (S4)**

**Fig S4.**

*Ex-vivo* cultures of human anterior segment were transfected with AdhuTGF $\beta$ 2 or AdEmpty control, and the change in pressure was monitored over time. The pressure increased significantly in AdhuTGF $\beta$ 2-transfected sample relative to the control after 6 days.

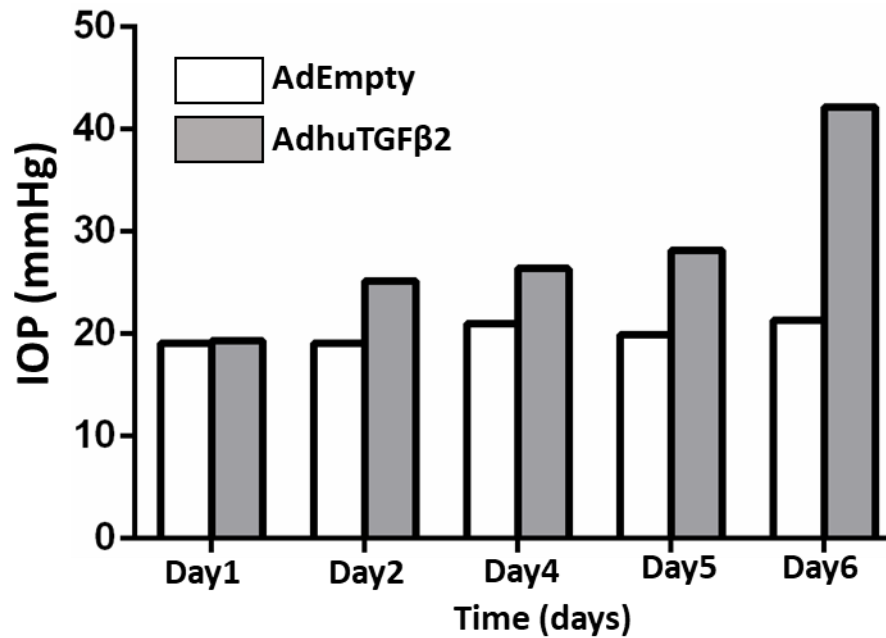

**Legend Fig S4.** Over expression of TGF $\beta$ 2 with AdhuTGF $\beta$ 2 in *ex-vivo* perfusion model of human anterior segment showed an increase in intraocular pressure (IOP) from 19 to 42 mmHg after 6 days. A parallel sample transfected with AdEmpty did not show any change. The experiment was done thrice with similar results and the representative data has been shown.

## Supplementary Figure 5 (S5)

### Fig S5.

Immunoblotting was carried out to verify if expression of ferritin in primary human trabecular meshwork cells responded to ferroportin change. Primary human trabecular meshwork cells were transfected with Ferroportin siRNA and scrambled controls (Dharmacon Inc.). Following ferroportin siRNA transfection, ferroportin expression downregulated and ferritin expression upregulated (**Figure S5 A**) in these cells. These data clearly indicate a positive response of iron levels following ferroportin alteration in TM cells. **Figure S5 B** shows the full blots.

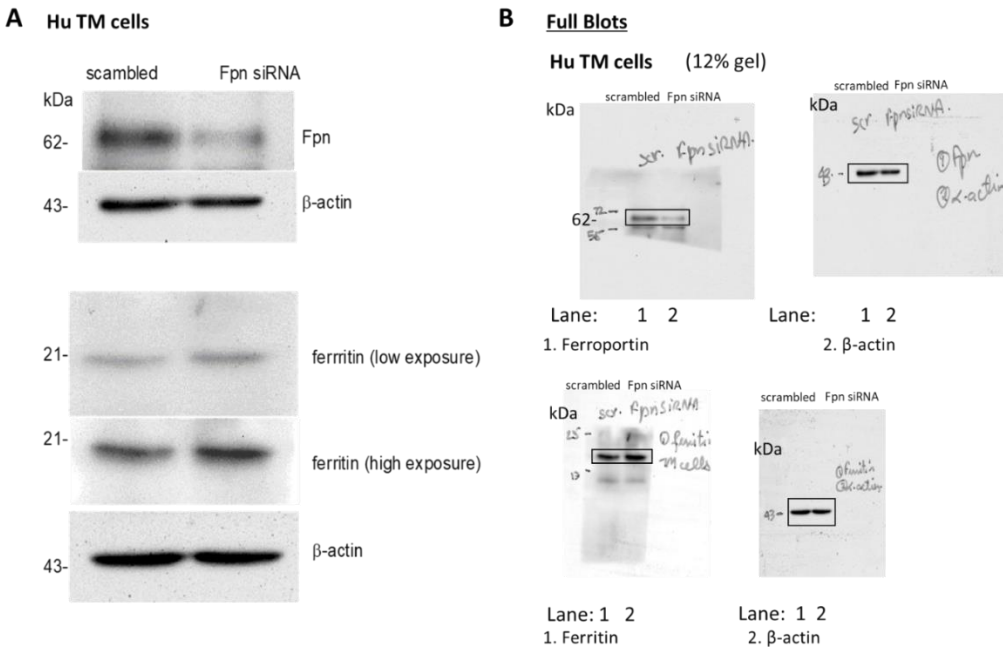

**Legend Fig S5. (A)** Immunoblotting was carried out for primary human TM cells treated with scrambled control and ferroportin siRNA. Ferroportin downregulated in the siRNA treated cells relative to the scrambled controls and there was an evident upregulation of ferritin. **(B)** Full blots are presented.

## **Supplementary Figure 6 (S6)**

### **Fig S6.**

Standardization of heparin concentration for effective hepcidin downregulation in primary human TM cells was carried out and the result is provided in Figure 4E, where heparin at 200 $\mu$ g/ml for 16 h proved most effective in blocking hepcidin. Heparin at 40-200 $\mu$ g/ml for 16 h did not induce significant cytotoxicity in primary human TM cells.

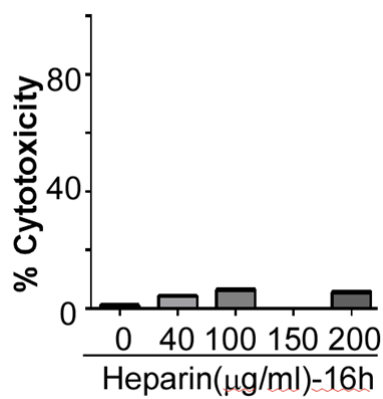

**Legend Fig S6.** LDH estimation was carried out for all heparin concentrations. No significant cytotoxicity was observed in any concentration of heparin treatments on primary human TM cells.

## **Supplementary Figure 7 (S7)**

### **Fig S7.**

Immunostaining of fixed sections, showed relatively stronger reactivity for ferritin in TM sections infected with AdhuTGF $\beta$ 2 relative to AdEmpty controls (**Figure S7, panels 1-4**). A serial section reacted with rabbit IgG control showed negative results, confirming the specificity of the reaction (**Figure S7, panel 5 & 6**).

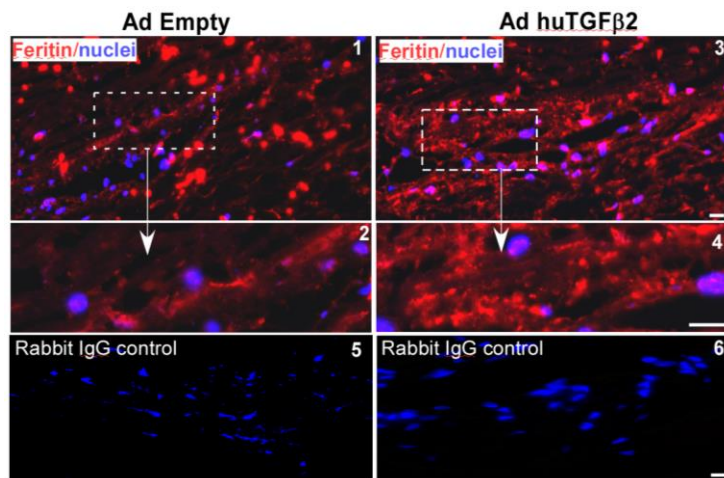

**Legend Fig S7.** Immunoreaction of fixed tissues from human anterior segment *ex-vivo* perfusion model shown in Figure 3C for ferritin shows more reactivity in samples over expressing TGF $\beta$ 2 relative to controls (panels 3 & 4 vs. 1 & 2). Control sections reacted with rabbit IgG and processed in parallel did not show a positive signal (panel 5 & 6). Scale bar: 25  $\mu$ m.

### **Supplementary Figure 8 (S8)**

#### **Fig S8.**

H<sub>2</sub>O<sub>2</sub> at a concentration of 0, 0.1, 0.2, 0.5, 1 and 2 mM was tested on primary human TM cells to optimize the concentration that induces maximum ROS generation with minimal cell death over 24 h. The experiment was conducted to standardize the positive control for DHE estimation in these cells (superoxide anion) following different study treatments. LDH assay using the supernatant as per kit instructions and ROS estimation (DHE staining) using the corresponding primary human TM cells clearly show an evident ROS generation of 20% at 0.2 mM H<sub>2</sub>O<sub>2</sub> with minimal cytotoxicity (2%). Therefore, this concentration was optimized as the positive control for all ROS estimation experiments in the current study.

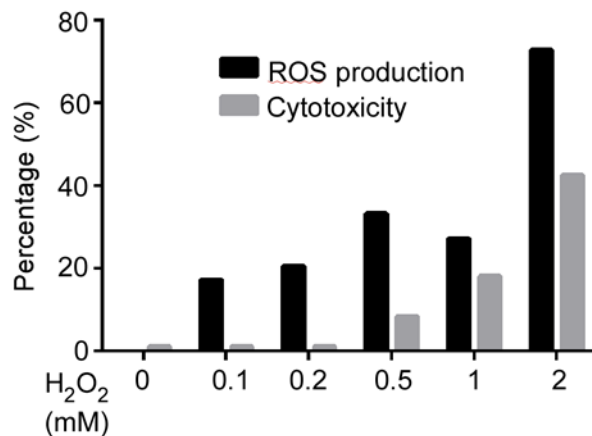

**Legend Fig S8.** Different H<sub>2</sub>O<sub>2</sub> concentrations were tested on primary human TM cells to estimate the optimal positive control for ROS estimation using DHE staining in these cells. 0.2 mM of H<sub>2</sub>O<sub>2</sub> for 24 h induced ROS production with minimal toxicity. Hence H<sub>2</sub>O<sub>2</sub> at 0.2 mM was used as the positive control for ROS estimation using DHE staining in the study.

## Supplementary Figure 9 (S9)

### Fig S9.

LDH estimation was carried out to calculate cytotoxicity in the treatments in Figure 5A. None of the study treatments showed significant cytotoxicity.

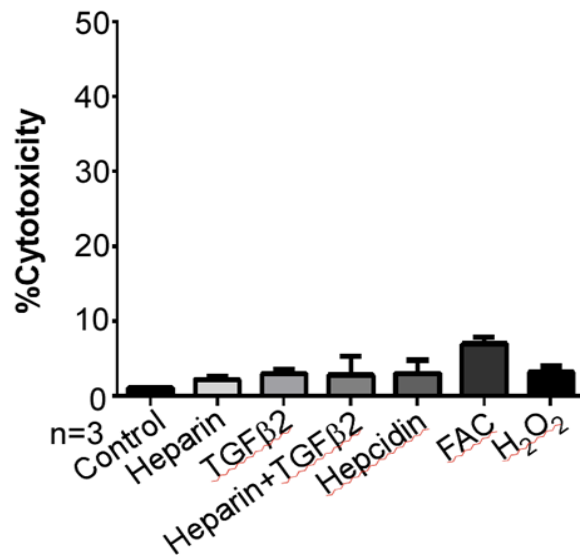

**Legend Fig S9.** LDH estimation was carried out for treatments in Figure 5A using cell supernatant. None of the treatment media showed a significant increase in LDH concentration relative to the control indicating no significant cytotoxicity.
